# Supplementary material
Source: ML conference proceedings conference paper supplement (https://openreview.net/forum?id=WDVD4lUCTzU)
Supplement: supplementary_material [file attachment]

## A METHODS FOR REPRESENTATIONS

We evaluate different representations method in Transformer-base models, including CMLM and BERT base (using the model on official Tensorflow Hub). The experiments are conducted on SentEval. Results in Table 8 show that MEAN representation exhibit better performance than CLS and MAX representations.

| Model          | MR   | CR   | SUBJ | MPQA | SST   | TREC | MRPC | SICK-E | SICK-R | Avg.        |
|----------------|------|------|------|------|-------|------|------|--------|--------|-------------|
| CMLM MAX       | 82.8 | 88.9 | 96.2 | 89.2 | 87.81 | 89.8 | 72.1 | 82.1   | 83.7   | 85.8        |
| CMLM MEAN      | 83.6 | 89.9 | 96.2 | 89.3 | 88.5  | 91.0 | 69.7 | 82.3   | 83.4   | <b>86.0</b> |
| CMLM CLS       | 79.1 | 84.3 | 94.2 | 86.9 | 84.9  | 82.6 | 68.4 | 79.3   | 81.7   | 82.4        |
| BERT base MAX  | 79.6 | 85.5 | 94.6 | 87.3 | 83.0  | 90.0 | 65.6 | 75.5   | 78.1   | 82.1        |
| BERT base MEAN | 81.6 | 87.4 | 95.2 | 87.8 | 85.8  | 90.6 | 71.1 | 79.3   | 80.5   | <b>84.3</b> |
| BERT base CLS  | 79.9 | 83.9 | 93.8 | 85.4 | 86.1  | 81.0 | 69.5 | 62.5   | 48.8   | 76.8        |

Table 8: Performance of sentence representations model with different representations method (MAX, MEAN and CLS).

## B EXPERIMENTS WITH DIFFERENT MASKING RATIOS

We test with different masking ratios in CMLM training data. Specifically, We tried masking 40, 60, 80 and 100 tokens of 256 tokens in the CMLM data. Performance of obtained models on SentEval are presented in Table 9.

| Mask Tokens | MR          | CR          | SUBJ        | MPQA        | SST         | TREC        | MRPC        | SICK-E      | SICK-R      | Avg.        |
|-------------|-------------|-------------|-------------|-------------|-------------|-------------|-------------|-------------|-------------|-------------|
| 40          | 81.8        | 89.3        | 95.3        | 87.8        | 87.0        | 90.2        | 68.5        | 77.5        | 77.6        | 83.9        |
| 60          | <b>83.7</b> | 89.5        | 95.8        | 88.9        | 88.0        | 90.3        | 68.7        | 79.5        | 82.8        | 85.4        |
| <b>80</b>   | 83.6        | <b>89.9</b> | <b>96.2</b> | <b>89.3</b> | <b>88.5</b> | <b>91.0</b> | 69.7        | <b>82.3</b> | <b>83.4</b> | <b>86.0</b> |
| 100         | 83.2        | 89.5        | 95.5        | 88.7        | 88.0        | 90.8        | <b>70.0</b> | 81.5        | 82.7        | 85.6        |

Table 9: Performance with different masking ratios in data (X-out-of-256) of CMLM base on SentEval.

## C TRAINING AND IMPLEMENTATION DETAILS

**Projection  $P$  in the CMLM modeling.** Let  $h$  denote the dimension of the input sentence vector (e.g.  $h = 768$  in BERT base;  $h = 1024$  in BERT large). Let  $FC(h_1, h_2, n)$  denote a fully connected layer with input dimension  $h_1$ , output dimension  $h_2$  and nonlinearity function  $n$ . The three layers are  $FC(h, 2 \times h, \text{ReLU})$ ,  $FC(2 \times h, 2 \times h, \text{ReLU})$ ,  $FC(2 \times h, h, \text{None})$ .
